# Supplementary material
Source: publisher figshare collection journal article supplement (https://sage.figshare.com/ndownloader/files/21239799)
Supplement: Supplementary file 1 [file 21239799]

## Appendix

**Table A1.** Items in Material Deprivation Index (MDI)

|                |                                                                                                                                                                        |
|----------------|------------------------------------------------------------------------------------------------------------------------------------------------------------------------|
| MDI: meat      | ...[you] do not eat meat, fish or chicken more often [than three times per week] because: you cannot afford to eat it more often                                       |
| MDI: fruit     | ...[you] do not eat fruits or vegetables more often [than three times per week] because: you cannot afford to eat it more often                                        |
| MDI: groceries | Can your household afford to regularly buy necessary groceries and household supplies?                                                                                 |
| MDI: holiday   | Could your household afford to go for a week long holiday away from home at least once a year?                                                                         |
| MDI: expense   | Could your household afford to pay an unexpected expense of [AffordExpenseAmount]* without borrowing any money?                                                        |
| MDI: clothing  | In the last twelve months, to help you keep your living costs down, have you... continued wearing clothing that was worn out because you could not afford replacement? |
| MDI: shoes     | ... continued wearing shoes that were worn out because you could not afford replacement?                                                                               |
| MDI: heating   | ... put up with feeling cold to save heating costs? MDI: glasses MDI: dentist                                                                                          |
| MDI: glasses   | ... gone without or not replaced glasses you needed because you could not afford new ones?                                                                             |
| MDI: doctor    | Was there a time in the past 12 months when you needed to see a doctor but could not because of cost?                                                                  |
| MDI: dentist   | ... postponed visits to the dentist?                                                                                                                                   |

*Source:* Adena, Myck, and Oczkowska, 2015 based off SHARE Wave 5 Questionnaire. *Note:*

\*[AffordExpenseAmount] corresponds to the country-specific relative poverty line defined at the level of 60 % of median monthly equivalised household income.

**Table A2.** Health index weights: principal component loadings

|                                                 | <i>Coefficients</i> |
|-------------------------------------------------|---------------------|
| Difficulty climbing stairs                      | 0.351               |
| Difficulty getting up from chair                | 0.351               |
| Difficulty with stooping, kneeling or crouching | 0.304               |
| Difficulty lifting or carrying                  | 0.297               |
| Difficulty pulling or pushing large objects     | 0.285               |
| Self-reported poor health                       | 0.273               |
| Difficulty sitting for 2 hours                  | 0.271               |
| Reports an ADLA                                 | 0.271               |
| Difficulty walking 100 yards/meters             | 0.268               |
| Whether bothered by pain                        | 0.248               |
| Depressed                                       | 0.196               |
| Difficulty picking up coin                      | 0.179               |
| Diagnosed arthritis                             | 0.143               |
| Diagnosed diabetes                              | 0.102               |
| Diagnosed heart attack                          | 0.100               |
| Diagnosed lung disease                          | 0.095               |
| Diagnosed stroke                                | 0.086               |
| Diagnosed high blood pressure                   | 0.081               |
| Diagnosed cancer                                | 0.059               |

*Source:* Based on the health index created by Poterba et al. (2013)

**Table A3.** Full regression results used for Table 2 (All family types)

|                           | Work-disability |           | Disability benefit |           |
|---------------------------|-----------------|-----------|--------------------|-----------|
|                           | SOL One         | SOL Two   | SOL One            | SOL Two   |
| Income (log)              | 0.682***        | -0.281*** | 0.702***           | -0.294*** |
| Work-disability           | -0.301***       | 0.173***  |                    |           |
| Disability benefits       |                 |           | -0.210***          | 0.116***  |
| Age                       | 0.147***        | -0.054*** | 0.140***           | -0.050*** |
| Secondary education       | 0.235***        | -0.077*** | 0.244***           | -0.084*** |
| Number of children        | -0.176***       | 0.103***  | -0.181***          | 0.105***  |
| Owens their home          | 0.311***        | -0.173*** | 0.319***           | -0.180*** |
| Austria                   | 0.000           | 0.000     | 0.000              | 0.000     |
| Germany                   | -0.105***       | 0.048***  | -0.140***          | 0.067***  |
| Sweden                    | 0.100***        | -0.017*   | 0.107***           | -0.021**  |
| Netherlands               | -0.021          | -0.006    | -0.033             | 0.000     |
| Spain                     | -0.315***       | 0.124***  | -0.317***          | 0.126***  |
| Italy                     | -0.428***       | 0.136***  | -0.423***          | 0.133***  |
| France                    | -0.186***       | 0.076***  | -0.204***          | 0.085***  |
| Denmark                   | 0.276***        | -0.032*** | 0.254***           | -0.022**  |
| Switzerland               | -0.048**        | 0.028***  | -0.052**           | 0.030***  |
| Belgium                   | -0.146***       | 0.056***  | -0.151***          | 0.061***  |
| Israel                    | -0.205***       | 0.069***  | -0.207***          | 0.071***  |
| Czech Republic            | -0.213***       | 0.053***  | -0.213***          | 0.053***  |
| Luxembourg                | -0.100***       | 0.045***  | -0.106***          | 0.048***  |
| Slovenia                  | -0.308***       | 0.083***  | -0.298***          | 0.078***  |
| Estonia                   | -0.434***       | 0.263***  | -0.435***          | 0.265***  |
| Observations              | 22990           | 22990     | 22990              | 22990     |
| Adjusted/Pseudo R-squared | 0.15            | 0.317     | 0.146              | 0.302     |

Note: Standardized beta coefficients. \* p<0.05, \*\* p<0.01, \*\*\* p<0.001

**Table A4.** Full regression results used for Table 2 (Married individuals only)

|                           | Work-disability |           | Disability benefit |           |
|---------------------------|-----------------|-----------|--------------------|-----------|
|                           | SOL One         | SOL Two   | SOL One            | SOL Two   |
| Income (log)              | 0.634***        | -0.272*** | 0.648***           | -0.281*** |
| Work-disability           | -0.286***       | 0.157***  |                    |           |
| Disability benefits       |                 |           | -0.192***          | 0.101***  |
| Age                       | 0.157***        | -0.050*** | 0.150***           | -0.047*** |
| Secondary education       | 0.259***        | -0.072*** | 0.268***           | -0.078*** |
| Number of children        | -0.200***       | 0.113***  | -0.204***          | 0.115***  |
| Owens their home          | 0.267***        | -0.147*** | 0.275***           | -0.153*** |
| Austria                   | 0.000           | 0.000     | 0.000              | 0.000     |
| Germany                   | -0.185***       | 0.065***  | -0.216***          | 0.082***  |
| Sweden                    | 0.085***        | 0.000     | 0.092***           | -0.003    |
| Netherlands               | -0.048*         | 0.005     | -0.059*            | 0.010     |
| Spain                     | -0.412***       | 0.156***  | -0.414***          | 0.159***  |
| Italy                     | -0.540***       | 0.174***  | -0.534***          | 0.171***  |
| France                    | -0.237***       | 0.085***  | -0.252***          | 0.093***  |
| Denmark                   | 0.245***        | -0.012    | 0.223***           | -0.002    |
| Switzerland               | -0.103***       | 0.049***  | -0.105***          | 0.050***  |
| Belgium                   | -0.183***       | 0.067***  | -0.190***          | 0.071***  |
| Israel                    | -0.251***       | 0.078***  | -0.252***          | 0.080***  |
| Czech Republic            | -0.263***       | 0.062***  | -0.263***          | 0.063***  |
| Luxembourg                | -0.131***       | 0.056***  | -0.135***          | 0.059***  |
| Slovenia                  | -0.407***       | 0.104***  | -0.397***          | 0.099***  |
| Estonia                   | -0.481***       | 0.273***  | -0.483***          | 0.277***  |
| Observations              | 16945           | 16945     | 16945              | 16945     |
| Adjusted/Pseudo R-squared | 0.151           | 0.302     | 0.147              | 0.289     |

Note: Standardized beta coefficients. \* p<0.05, \*\* p<0.01, \*\*\* p<0.001

**Table A5.** Full regression results used for Table 2 (Single individuals only)

|                           | Work-disability |           | Disability benefit |           |
|---------------------------|-----------------|-----------|--------------------|-----------|
|                           | SOL One         | SOL Two   | SOL One            | SOL Two   |
| Income (log)              | 0.610***        | -0.226*** | 0.648***           | -0.251*** |
| Work-disability           | -0.338***       | 0.210***  |                    |           |
| Disability benefits       |                 |           | -0.237***          | 0.142***  |
| Age                       | 0.118***        | -0.063*** | 0.112***           | -0.059*** |
| Secondary education       | 0.208***        | -0.101*** | 0.220***           | -0.111*** |
| Number of children        | -0.172***       | 0.104***  | -0.176***          | 0.106***  |
| Owens their home          | 0.316***        | -0.185*** | 0.326***           | -0.192*** |
| Austria                   | 0.000           | 0.000     | 0.000              | 0.000     |
| Germany                   | 0.024           | 0.024     | -0.018             | 0.048**   |
| Sweden                    | 0.129***        | -0.054*** | 0.139***           | -0.061*** |
| Netherlands               | -0.013          | -0.021    | -0.027             | -0.010    |
| Spain                     | -0.171***       | 0.084***  | -0.168***          | 0.083***  |
| Italy                     | -0.237***       | 0.077***  | -0.232***          | 0.073***  |
| France                    | -0.094**        | 0.061***  | -0.117***          | 0.074***  |
| Denmark                   | 0.329***        | -0.077*** | 0.304***           | -0.065*** |
| Switzerland               | 0.064*          | -0.018    | 0.053              | -0.014    |
| Belgium                   | -0.080*         | 0.035*    | -0.083*            | 0.039*    |
| Israel                    | -0.127***       | 0.062***  | -0.130***          | 0.064***  |
| Czech Republic            | -0.147***       | 0.047**   | -0.147***          | 0.046**   |
| Luxembourg                | -0.057*         | 0.028*    | -0.064*            | 0.032*    |
| Slovenia                  | -0.134***       | 0.064***  | -0.120***          | 0.055***  |
| Estonia                   | -0.365***       | 0.255***  | -0.362***          | 0.255***  |
| Observations              | 6045            | 6045      | 6045               | 6045      |
| Adjusted/Pseudo R-squared | 0.133           | 0.308     | 0.127              | 0.286     |

*Note:* Standardized beta coefficients. \*  $p < 0.05$ , \*\*  $p < 0.01$ , \*\*\*  $p < 0.001$

**Table A6.** Full regression results used for Table 4 (Working individuals only)

|                           | Work-disability |           | Disability benefit |           |
|---------------------------|-----------------|-----------|--------------------|-----------|
|                           | SOL One         | SOL Two   | SOL One            | SOL Two   |
| Income (log)              | 0.650***        | -0.238*** | 0.656***           | -0.242*** |
| Work-disability           | -0.205***       | 0.112***  |                    |           |
| Disability benefits       |                 |           | -0.097***          | 0.053***  |
| Age                       | 0.172***        | -0.048*** | 0.170***           | -0.047*** |
| Secondary education       | 0.239***        | -0.084*** | 0.248***           | -0.089*** |
| Number of children        | -0.205***       | 0.094***  | -0.205***          | 0.095***  |
| Owns their home           | 0.275***        | -0.133*** | 0.278***           | -0.136*** |
| Austria                   | 0.000           | 0.000     | 0.000              | 0.000     |
| Germany                   | -0.169***       | 0.071***  | -0.182***          | 0.077***  |
| Sweden                    | 0.113***        | -0.007    | 0.126***           | -0.015    |
| Netherlands               | -0.041          | 0.006     | -0.039             | 0.005     |
| Spain                     | -0.348***       | 0.121***  | -0.338***          | 0.116***  |
| Italy                     | -0.481***       | 0.134***  | -0.468***          | 0.128***  |
| France                    | -0.228***       | 0.099***  | -0.226***          | 0.098***  |
| Denmark                   | 0.296***        | -0.013    | 0.286***           | -0.010    |
| Switzerland               | -0.076*         | 0.044***  | -0.072*            | 0.041***  |
| Belgium                   | -0.155***       | 0.064***  | -0.146***          | 0.059***  |
| Israel                    | -0.231***       | 0.090***  | -0.225***          | 0.087***  |
| Czech Republic            | -0.249***       | 0.064***  | -0.241***          | 0.059***  |
| Luxembourg                | -0.109***       | 0.049***  | -0.109***          | 0.049***  |
| Slovenia                  | -0.262***       | 0.064***  | -0.258***          | 0.062***  |
| Estonia                   | -0.511***       | 0.301***  | -0.498***          | 0.296***  |
| Observations              | 12994           | 12994     | 12994              | 12994     |
| Adjusted/Pseudo R-squared | 0.137           | 0.139     | 0.134              | 0.140     |

Note: Standardized beta coefficients. \* p<0.05, \*\* p<0.01, \*\*\* p<0.001.

**Table A7.** Full regression results for severity Table 3.

|                                                      | SOL One   | SOL Two   |
|------------------------------------------------------|-----------|-----------|
| Income (log)                                         | 0.681***  | -0.278*** |
| 1 <sup>st</sup> health quintile<br>(the best health) | 0.000     | 0.000     |
| 2 <sup>nd</sup> health quintile                      | -0.056*** | 0.030***  |
| 3 <sup>rd</sup> health quintile                      | -0.110*** | 0.050***  |
| 4 <sup>th</sup> health quintile                      | -0.251*** | 0.120***  |
| 5 <sup>th</sup> health quintile                      | -0.405*** | 0.241***  |
| Age                                                  | 0.177***  | -0.068*** |
| Secondary education                                  | 0.220***  | -0.067*** |
| Number of children                                   | -0.167*** | 0.097***  |
| Owens their home                                     | 0.305***  | -0.168*** |
| Austria                                              | 0.000     | 0.000     |
| Germany                                              | -0.107*** | 0.048***  |
| Sweden                                               | 0.087***  | -0.010    |
| Netherlands                                          | -0.036*   | 0.001     |
| Spain                                                | -0.322*** | 0.126***  |
| Italy                                                | -0.417*** | 0.126***  |
| France                                               | -0.182*** | 0.072***  |
| Denmark                                              | 0.253***  | -0.019*   |
| Switzerland                                          | -0.067*** | 0.037***  |
| Belgium                                              | -0.132*** | 0.047***  |
| Israel                                               | -0.210*** | 0.070***  |
| Czech Republic                                       | -0.217*** | 0.053***  |
| Luxembourg                                           | -0.086*** | 0.035***  |
| Slovenia                                             | -0.294*** | 0.074***  |
| Estonia                                              | -0.422*** | 0.253***  |
| Observations                                         | 22990     | 22990     |
| Adjusted/Pseudo R-squared                            | .155      | .335      |

*Note:* Standardized beta coefficients. \*  $p < 0.05$ , \*\*  $p < 0.01$ , \*\*\*  $p < 0.001$

**Table A8.** Extra cost estimates by country and disability category (SOL Two)

|                | Work-disability<br>(%) | Disability Benefit<br>(%) | Observations |
|----------------|------------------------|---------------------------|--------------|
| Austria        | -71                    | -29                       | 1,503        |
| Germany        | -42                    | -15                       | 2,462        |
| Sweden         | -75                    | -83                       | 1,323        |
| Netherlands    | -129                   | -56                       | 1,491        |
| Spain          | -66                    | -34                       | 1,970        |
| Italy          | -65                    | -25                       | 1,502        |
| France         | -45                    | -10                       | 1,715        |
| Denmark        | -67                    | -33                       | 1,756        |
| Switzerland    | -125                   | -53                       | 1,162        |
| Belgium        | -79                    | -54                       | 2,392        |
| Israel         | -62                    | -34                       | 385          |
| Czech Republic | -86                    | -24                       | 1,551        |
| Luxembourg     | -81                    | -32                       | 770          |
| Slovenia       | -52                    | -38                       | 1,117        |
| Estonia        | -77                    | -46                       | 1,891        |

*Note:* Calculations are based on estimation approach used in Table 4 for each country separately using SOL Two. All models control for age, secondary education, number of children, and home ownership.



**Table A9.** Extra costs estimate by welfare state regime (SOL Two)

|                      |                       |      | Income<br>(log) | Disability | Observations |
|----------------------|-----------------------|------|-----------------|------------|--------------|
| Social<br>Democratic | Work-Disabled         | -68% | -0.251          | 0.172      | 3079         |
|                      | Disability<br>Benefit | -71% | -0.258          | 0.184      | 3079         |
| Corporatist          | Work-Disabled         | -63% | -0.293          | 0.185      | 11495        |
|                      | Disability<br>Benefit | -37% | -0.309          | 0.114      | 11495        |
| Mediterranean        | Work-Disabled         | -66% | -0.248          | 0.165      | 3857         |
|                      | Disability<br>Benefit | -38% | -0.255          | 0.097      | 3857         |
| Eastern<br>European  | Work-Disabled         | -80% | -0.258          | 0.206      | 4559         |
|                      | Disability<br>Benefit | -55% | -0.270          | 0.149      | 4559         |

*Note:* Calculations are based on the approach used in Table 4 for each country separately using SOL One. All models control for age, secondary education, number of children, and home ownership. Social Democratic = Sweden and Denmark; Conservative Regimes = Austria, Germany, the Netherlands, Switzerland, Belgium, and Luxembourg; Mediterranean regimes = Spain, Italy, Israel, and France; Eastern European welfare state regimes = Poland, Estonia, and Slovenia. Israel is considered a Mediterranean regime as following Gal (2010).
